# Supplementary material for: Au-iClick mirrors the mechanism of copper catalyzed azide–alkyne cycloaddition (CuAAC)
Source: Royal Society of Chemistry journal article supplement (doi:10.1039/c5dt02405f), 2015-01-01
Supplement: c5dt02405f1.pdf [file c5dt02405f1.pdf]

Supporting Information for

## Au-iClick mirrors the mechanism of copper catalyzed azide-alkyne cycloaddition (CuAAC).

Andrew R. Powers, Ion Ghiviriga, Khalil A. Abboud, and Adam S. Veige.\*

*University of Florida, Department of Chemistry, Center for Catalysis,  
Gainesville, FL, 32611.*

| <i>Index</i>                                                                  | <i>Page</i> |
|-------------------------------------------------------------------------------|-------------|
| <u>Synthesis and characterization of <b>3-NO<sub>2</sub></b>.</u>             |             |
| Synthesis                                                                     | S2          |
| <sup>31</sup> P{H} NMR (CDCl <sub>3</sub> , 121.4 MHz) spectrum               | S3          |
| <sup>1</sup> H NMR (CDCl <sub>3</sub> , 300 MHz) spectrum                     | S3          |
| <sup>1</sup> H- <sup>13</sup> C gHMBC (CDCl <sub>3</sub> , 500 MHz) spectrum  | S4          |
| <u>Synthesis and characterization of <b>3-OMe</b>.</u>                        |             |
| Synthesis                                                                     | S5          |
| <sup>31</sup> P{H} NMR (CDCl <sub>3</sub> , 121.4 MHz) spectrum               | S6          |
| <sup>1</sup> H NMR (CDCl <sub>3</sub> , 300 MHz) spectrum                     | S6          |
| <sup>1</sup> H- <sup>13</sup> C gHMBC (CDCl <sub>3</sub> , 500 MHz) spectrum  | S7          |
| <u>Synthesis and characterization of <b>6-F</b>.</u>                          |             |
| Synthesis                                                                     | S8          |
| <sup>31</sup> P{H} NMR (CDCl <sub>3</sub> , 121.4 MHz) spectrum               | S9          |
| <sup>1</sup> H NMR (CDCl <sub>3</sub> , 300 MHz) spectrum                     | S9          |
| <sup>19</sup> F{H} NMR (CDCl <sub>3</sub> , 282.2 MHz) spectrum               | S10         |
| <sup>1</sup> H- <sup>13</sup> C gHMBC (CDCl <sub>3</sub> , 500 MHz) spectrum  | S10         |
| <u>Kinetic Profiles.</u>                                                      | S11-14      |
| <u>Single crystal X-ray diffraction structure of <b>3-NO<sub>2</sub></b>.</u> |             |
| Molecular structure                                                           | S15         |
| X-Ray experimental details                                                    | S15-S16     |
| Crystal data and refinement                                                   | S17         |
| Table of atomic coordinates                                                   | S18-S19     |
| Table of bond lengths                                                         | S20         |
| Table of bond angles                                                          | S21-S22     |
| Anisotropic displacement parameters                                           | S23-S24     |

## Synthesis of **3-R** (R = NO<sub>2</sub>, OMe, F)

A general procedure was followed for the iClick reaction between PPh<sub>3</sub>Au-N<sub>3</sub> (**1**) and PPh<sub>3</sub>Au-C≡C-Ph-R (**2-R**, R = H, NO<sub>2</sub>, F, OMe) to yield **3-R**. Complex **1** (0.04 mmol) was taken up in CDCl<sub>3</sub> (0.3 mL) and added to a solution of **2-R** (0.04 mmol) also in CDCl<sub>3</sub> (0.3 mL). The reaction mixture was transferred to a sealable NMR tube and the reaction progress was monitored via <sup>31</sup>P{<sup>1</sup>H} and <sup>1</sup>H NMR spectroscopy. The reactions all proceed quantitatively by NMR and can be isolated by removing all the volatiles in vacuo and then triturating with pentane.

## Synthesis and characterization of **3-NO<sub>2</sub>**.

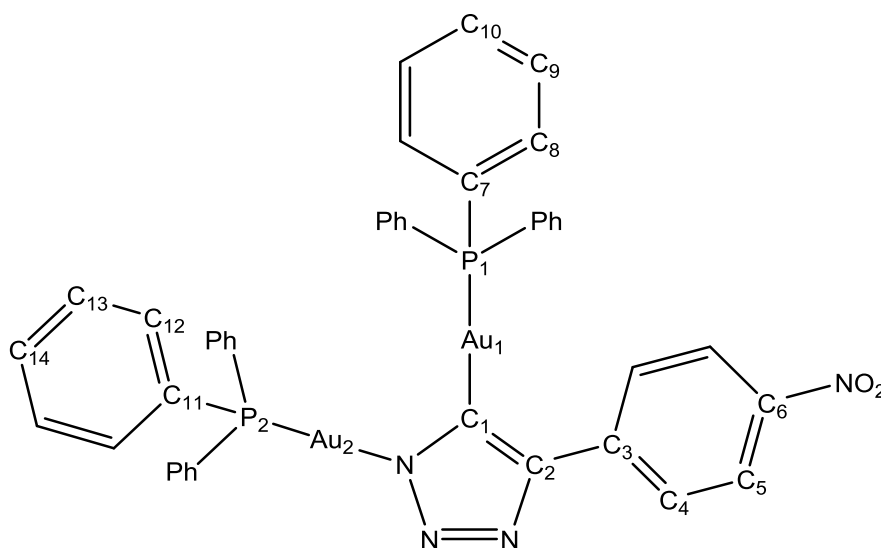

Figure S1. Atom labeling scheme for NMR chemical shift assignments for complex **3-NO<sub>2</sub>**.

**3-NO<sub>2</sub>**: 94% Yield (41 mg, 0.037 mmol). <sup>1</sup>H NMR (300 MHz, CDCl<sub>3</sub>): δ 8.59 (d, <sup>3</sup>J<sub>HH</sub> = 8.5 Hz, 2H, C<sub>4</sub>-H), 8.11 (d, <sup>3</sup>J<sub>HH</sub> = 8.5 Hz, 2H, C<sub>5</sub>-H), 7.47 (m, 18H, aromatic), 7.30 (m, 12H, aromatic). <sup>13</sup>C{<sup>1</sup>H} NMR (indirect detection through <sup>1</sup>H-<sup>13</sup>C gHMBC and <sup>1</sup>H-<sup>13</sup>C gHSQC (500 MHz, CDCl<sub>3</sub>)): δ 149.7 (C<sub>2</sub>), 145.3 (C<sub>6</sub>), 143.5 (C<sub>3</sub>), 134.2 (C<sub>7</sub>, C<sub>8</sub>, C<sub>11</sub>, C<sub>12</sub>), 131.7 (C<sub>10</sub>), 131.6 (C<sub>14</sub>), 129.1 (C<sub>9</sub>, C<sub>13</sub>), 125.9 (C<sub>4</sub>), 123.7 (C<sub>5</sub>). <sup>31</sup>P{<sup>1</sup>H} NMR (121.4 MHz, CDCl<sub>3</sub>): δ 44.39 (s, P<sub>1</sub>), 32.08 (s, P<sub>2</sub>). Anal. Calcd. for C<sub>44</sub>H<sub>34</sub>Au<sub>2</sub>P<sub>2</sub>N<sub>4</sub>O<sub>2</sub>: C, 47.75; H, 3.10; N, 5.06. Found: C, 47.91; H, 3.26; N, 5.16.

arp031215\_b5p028\_click\_PPh3Au\_N3\_CCPH4NO2\_AISolYel\_P\_CDCl3

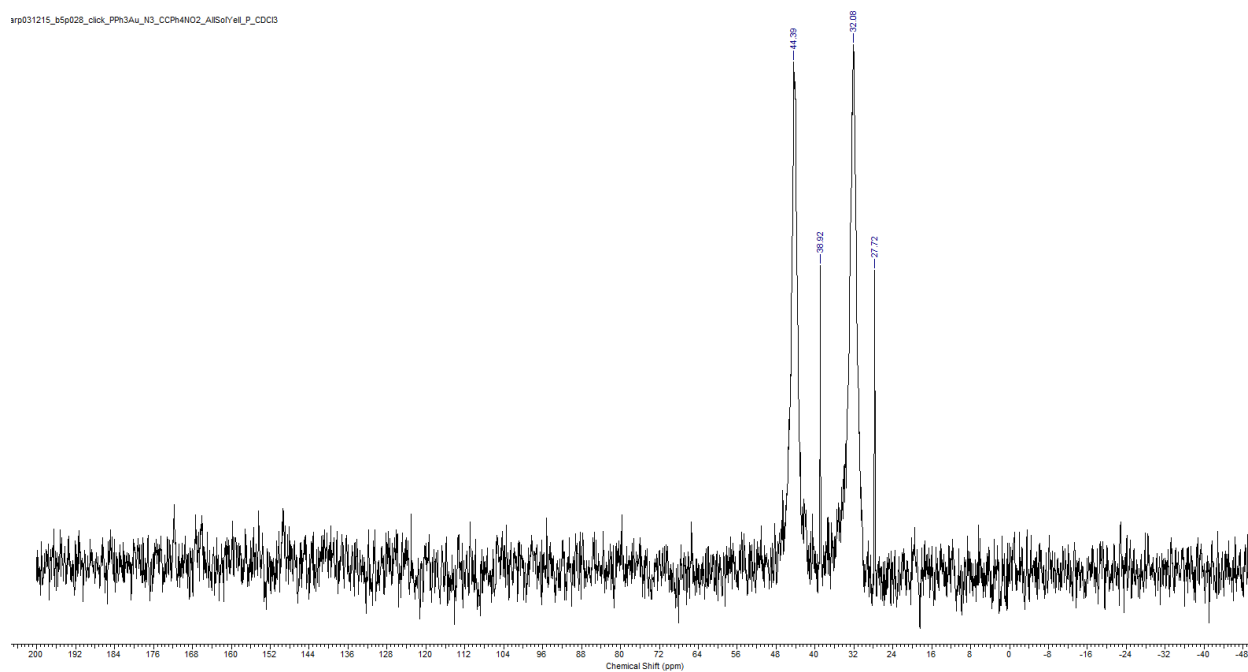

Figure S2.  $^{31}\text{P}\{^1\text{H}\}$  NMR ( $\text{CDCl}_3$ , 121.4 MHz) spectrum of **3-NO<sub>2</sub>**.

arp031415\_b5p028\_click\_PPh3Au\_N3\_CCPH4NO2\_AISolYel\_C6D6Wash\_H\_CDCD

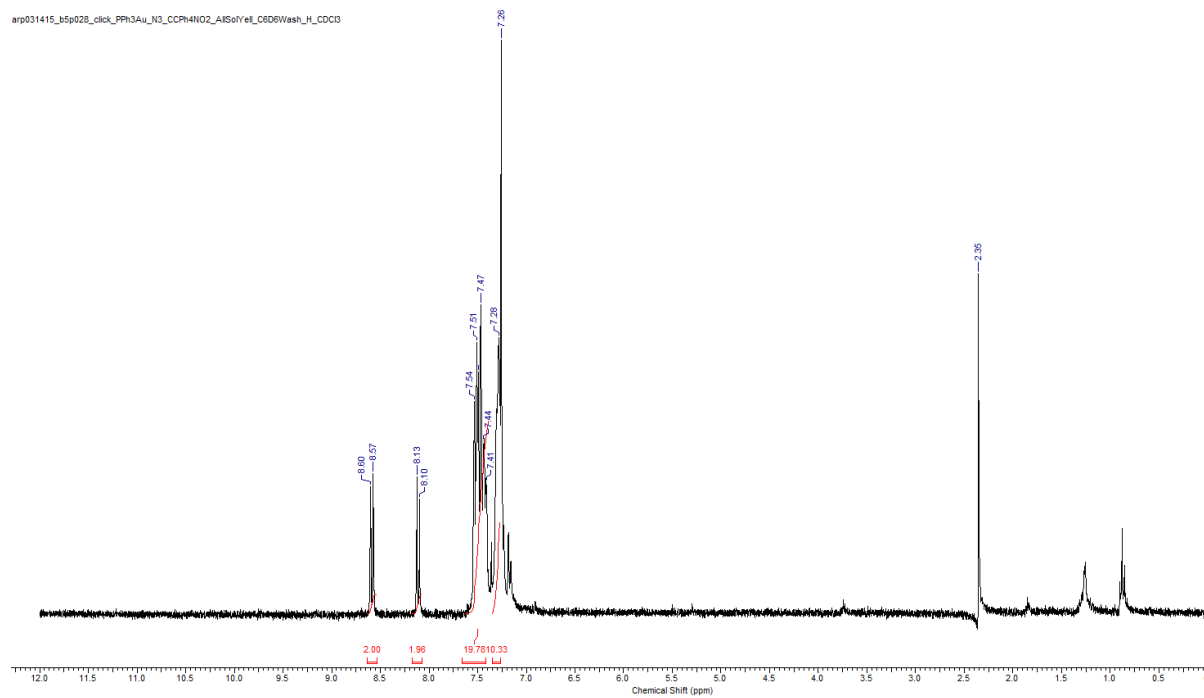

Figure S3.  $^1\text{H}$  NMR ( $\text{CDCl}_3$ , 300 MHz) spectrum of **3-NO<sub>2</sub>**.

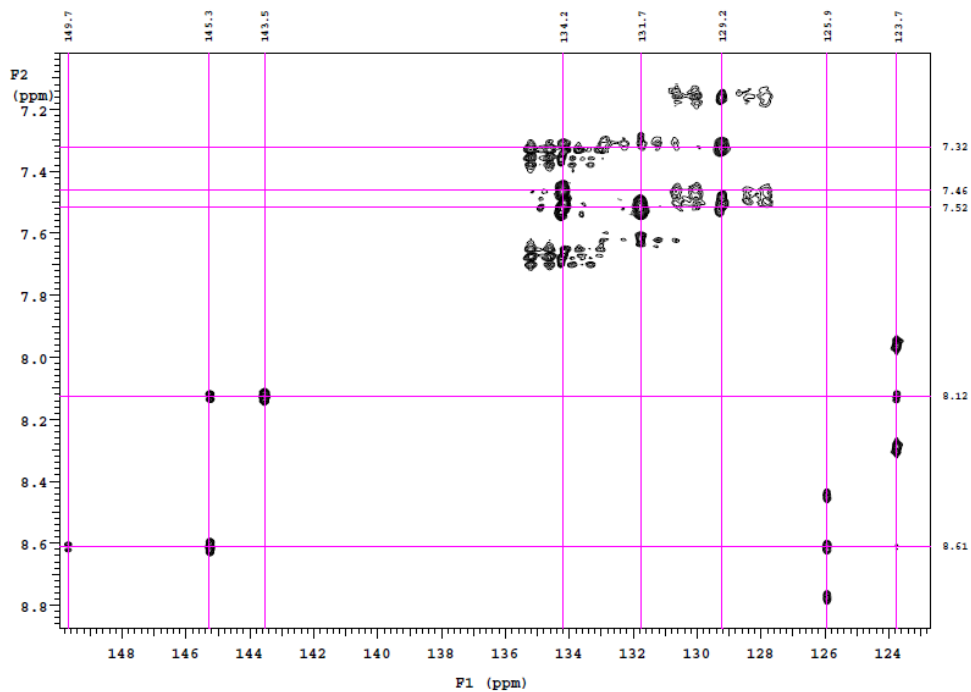

Figure S4.  $^1\text{H}$ - $^{13}\text{C}$  gHMBC spectrum (500 MHz,  $\text{CDCl}_3$ ) of **3-NO<sub>2</sub>**.

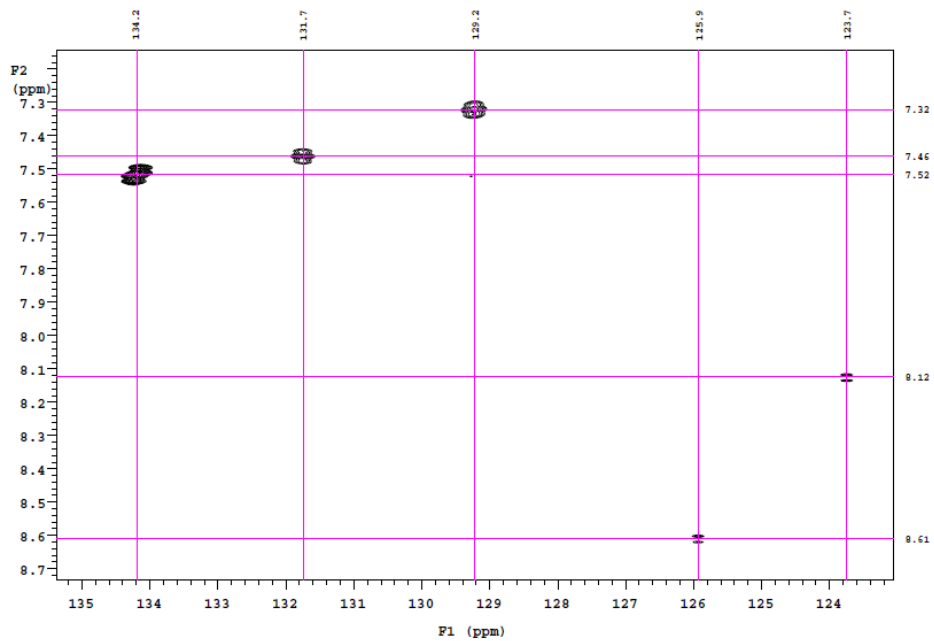

Figure S5.  $^1\text{H}$ - $^{13}\text{C}$  gHMBC spectrum (500 MHz,  $\text{CDCl}_3$ ) of **3-NO<sub>2</sub>**.

## Synthesis and characterization of **3-OMe**.

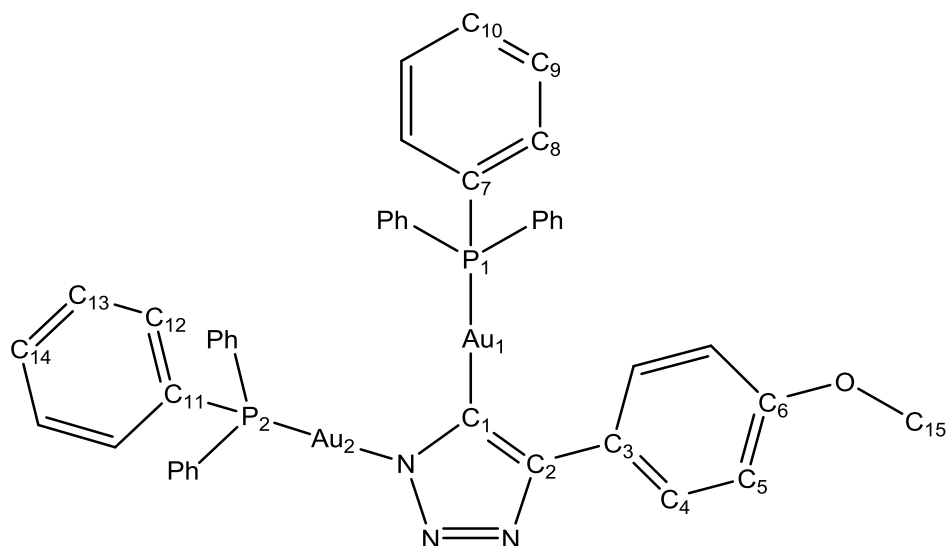

Figure S6. Atom labeling scheme for NMR chemical shift assignments for complex **3-OMe**.

**3-OMe**: 90% Yield (39 mg, 0.036 mmol).  $^1\text{H}$  NMR (300 MHz,  $\text{CDCl}_3$ ):  $\delta$  8.32 (d,  $^3J_{\text{HH}} = 8.2$  Hz, 2H, C4-*H*), 7.46 (m, 18H, aromatic), 7.30 (m, 12H, aromatic), 6.84 (d,  $^3J_{\text{HH}} = 8.2$  Hz, 2H, C5-*H*), 3.81 (s, 3H,  $\text{OCH}_3$ ).  $^{13}\text{C}\{^1\text{H}\}$  NMR shifts (indirect detection through  $^1\text{H}$ - $^{13}\text{C}$  gHMBC and  $^1\text{H}$ - $^{13}\text{C}$  gHSQC (500 MHz,  $\text{CDCl}_3$ ):  $\delta$  157.8 (C6), 151.2 (C2), 134.2 (C7, C8, C11, C12), 131.6 (C10, C14), 129.6 (C3), 129.1 (C9, C13), 127.6 (C4), 113.4 (C5), 55.3 (C15).  $^{31}\text{P}\{^1\text{H}\}$  NMR (121.4 MHz,  $\text{CDCl}_3$ ):  $\delta$  44.58 (s, P1), 31.81 (s, P2). Anal. Calcd. for  $\text{C}_{45}\text{H}_{37}\text{Au}_2\text{P}_2\text{N}_3\text{O}$ : C, 49.51; H, 3.42; N, 3.85. Found: C, 49.79; H, 3.25; N, 3.65.

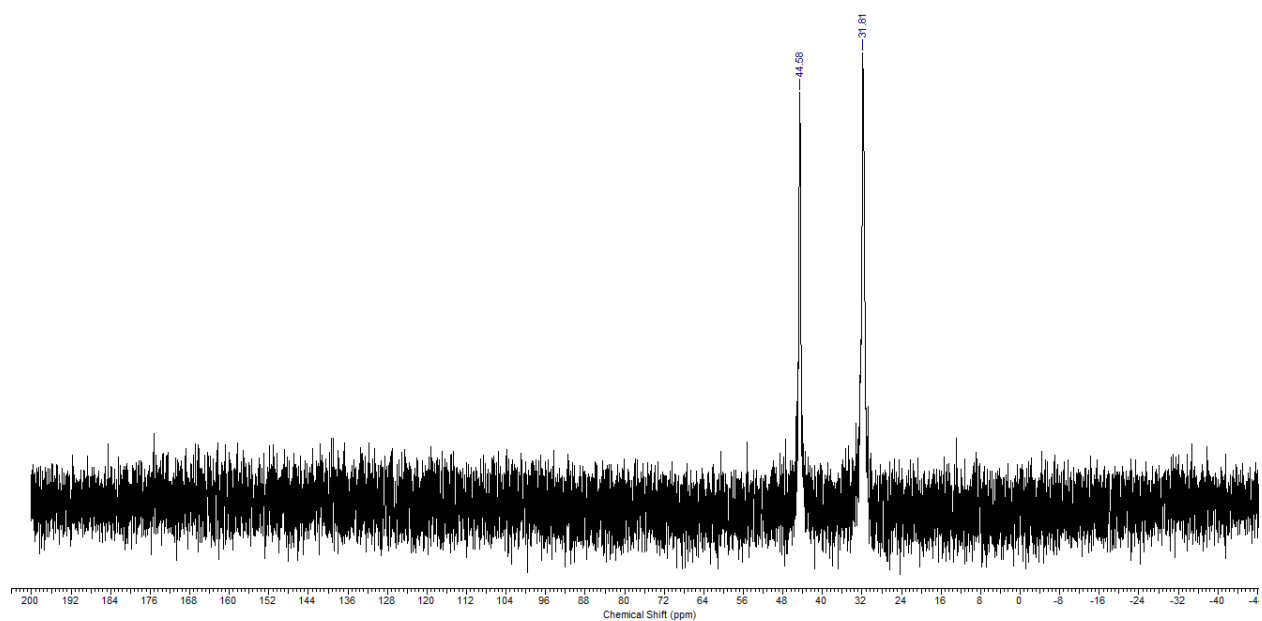

Figure S7.  $^{31}\text{P}\{^1\text{H}\}$  NMR ( $\text{CDCl}_3$ , 121.4 MHz) spectrum of **3-OMe**.

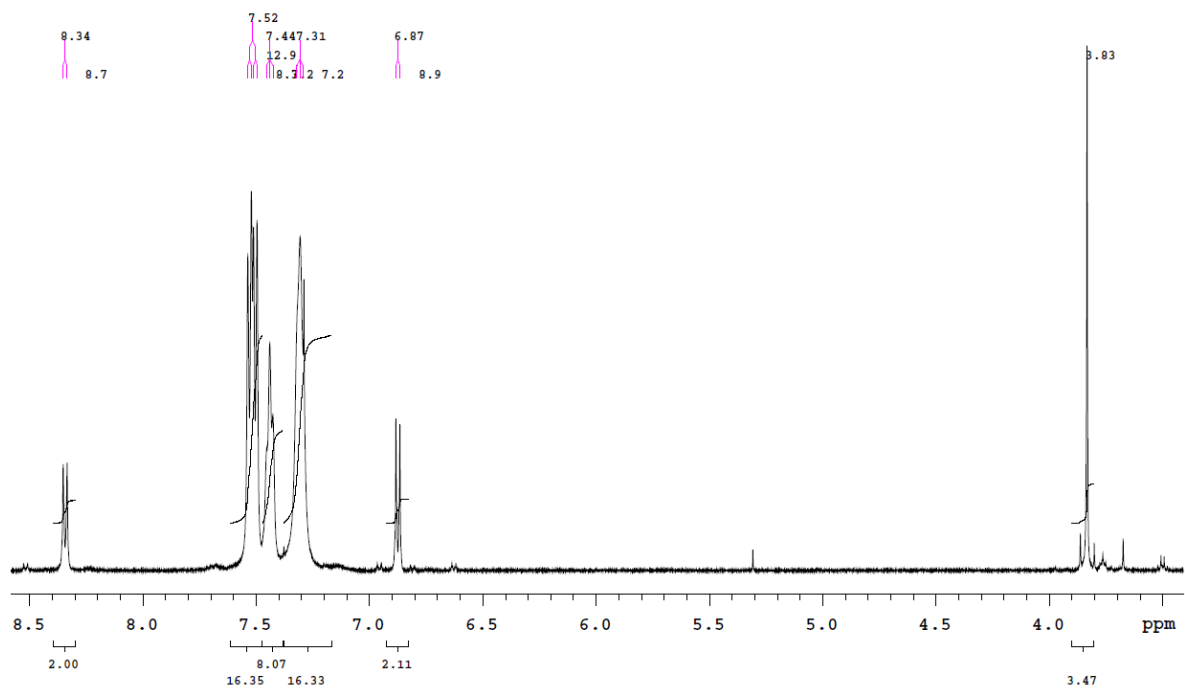

Figure S8.  $^1\text{H}$  NMR ( $\text{CDCl}_3$ , 300 MHz) spectrum of **3-OMe**.

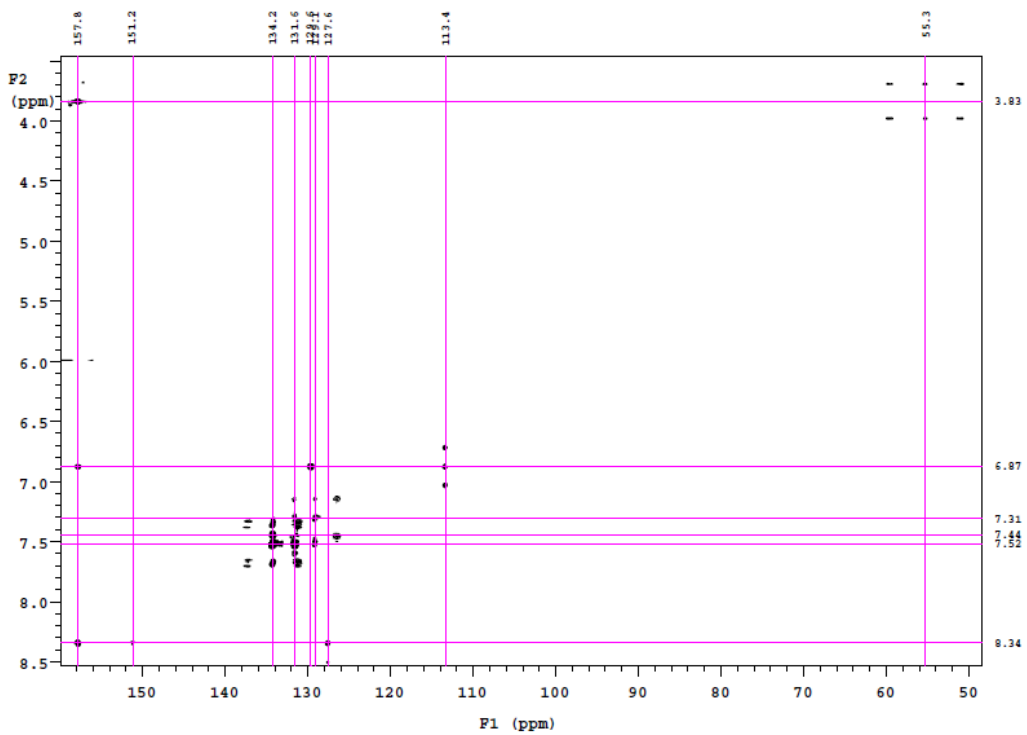

Figure S9.  $^1\text{H}$ - $^{13}\text{C}$  gHMBC spectrum ( $\text{CDCl}_3$ , 500 MHz) of **3-OMe**.

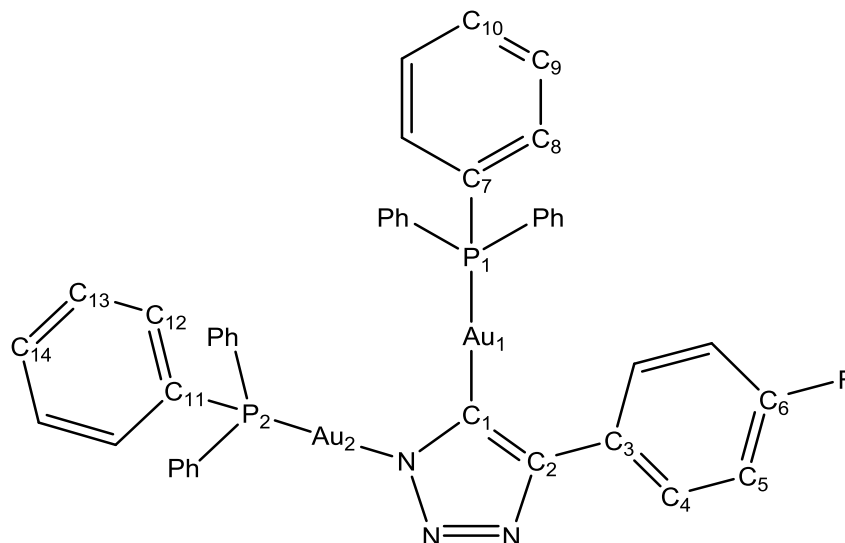

Figure S10. Atom labeling scheme for NMR chemical shift assignments for complex **3-F**.

**3-F**: 89% Yield (38 mg, 0.035 mmol).  $^1\text{H}$  NMR (300 MHz,  $\text{CDCl}_3$ ):  $\delta$  8.34 (dd,  $^3J_{\text{HH}} = 8.6$  Hz,  $^4J_{\text{HF}} = 6.1$  Hz 2H, C4-*H*), 7.45 (m, 18H, aromatic), 7.30 (m, 12H, aromatic), 6.95 (dd,  $^3J_{\text{HF}} = 8.6$  Hz,  $^3J_{\text{HH}} = 8.6$  Hz, 2H, C5-*H*).  $^{13}\text{C}\{^1\text{H}\}$  NMR shifts (indirect detection through  $^1\text{H}$ - $^{13}\text{C}$  gHMBC and  $^1\text{H}$ - $^{13}\text{C}$  gHSQC (500 MHz,  $\text{CDCl}_3$ ):  $\delta$  161.4 (C6), 150.6 (C2), 132.9 (C3), 132.4 (C7, C8, C11, C12), 131.6 (C10, C14), 129.1 (C9, C13), 127.8 (C4), 114.5 (C5).  $^{31}\text{P}\{^1\text{H}\}$  NMR (121.4 MHz,  $\text{CDCl}_3$ ):  $\delta$  44.50 (s, P1), 31.77 (s, P2).  $^{19}\text{F}\{^1\text{H}\}$  NMR (282.2 MHz,  $\text{CDCl}_3$ ):  $\delta$  -118.8 (s, F). Anal. Calcd. for  $\text{C}_{44}\text{H}_{34}\text{Au}_2\text{P}_2\text{N}_3\text{F}$ : C, 48.79; H, 2.97; N, 3.80. Found: C, 48.95; H, 3.17; N, 3.89.



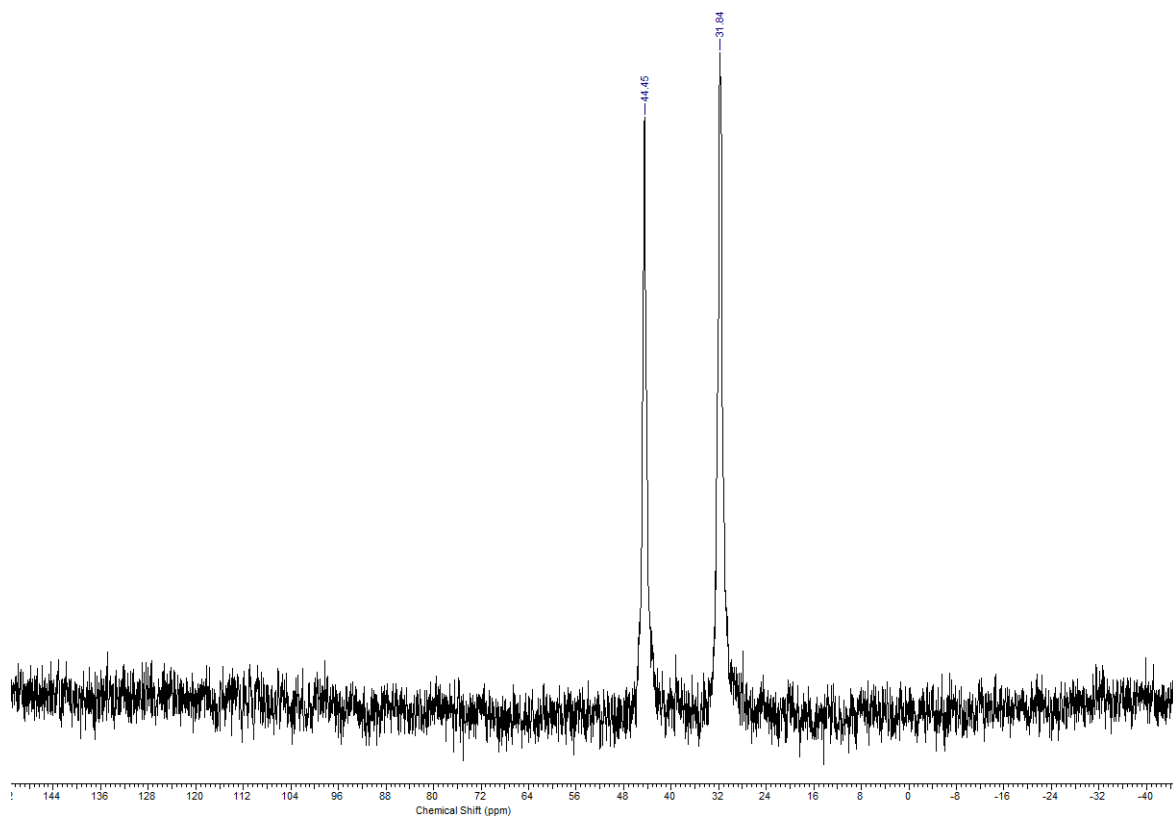

Figure S11.  $^{31}\text{P}\{^1\text{H}\}$  NMR ( $\text{CDCl}_3$ , 121.4 MHz) spectrum of **3-F**.

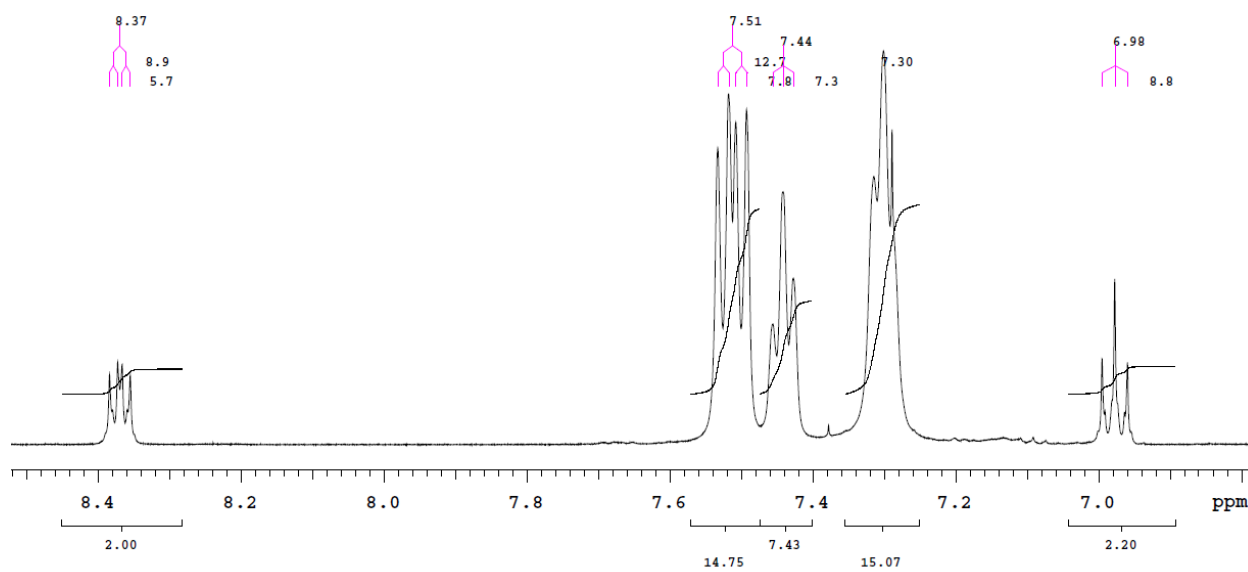

Figure S12.  $^1\text{H}$  NMR ( $\text{CDCl}_3$ , 300 MHz) spectrum of **3-F**.

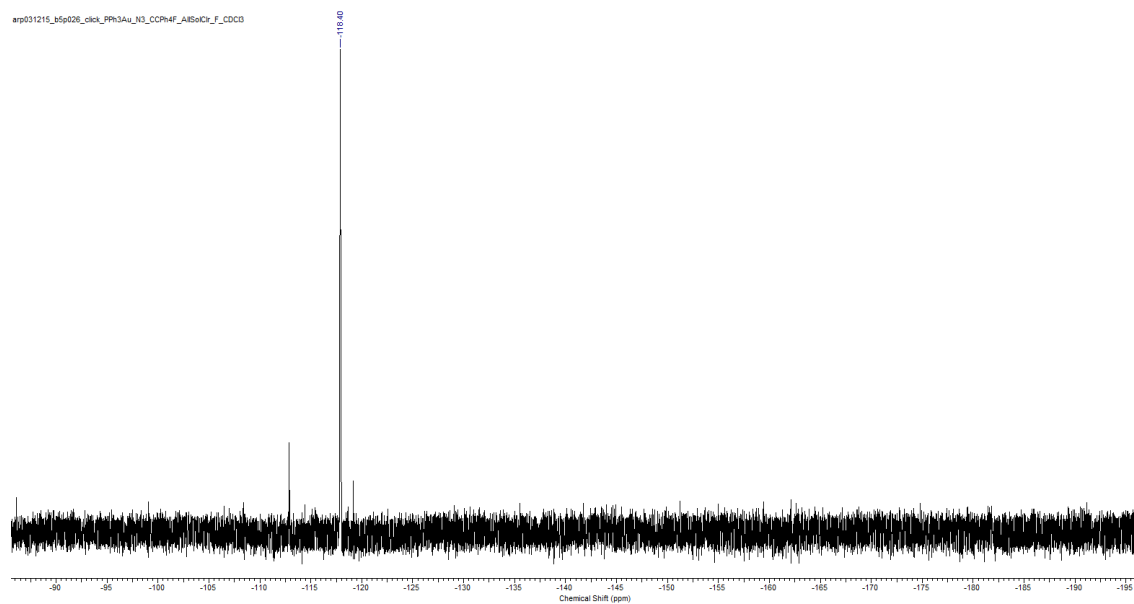

Figure S13.  $^{19}\text{F}\{^1\text{H}\}$  NMR ( $\text{CDCl}_3$ , 282.2 MHz) spectrum of **3-F**.

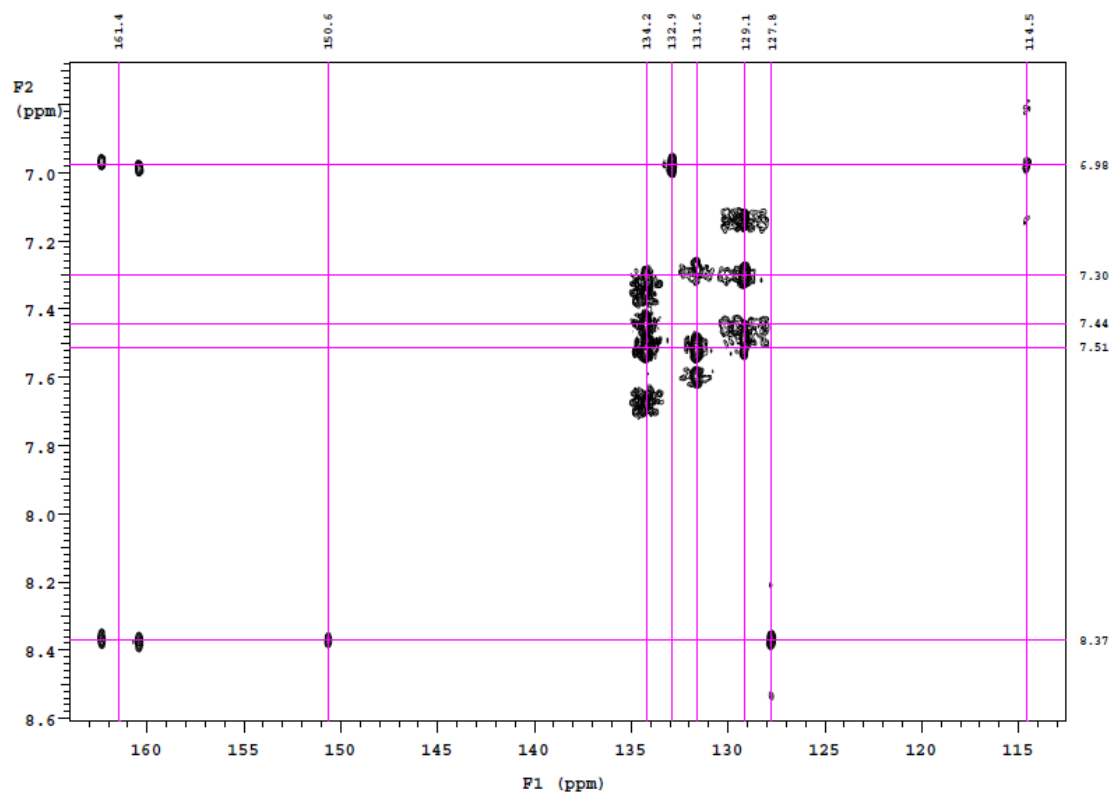

Figure S14.  $^1\text{H}$ - $^{13}\text{C}$  gHMBC spectrum ( $\text{CDCl}_3$ , 500 MHz) of **3-F**.

## General guidelines for kinetic experiments

All kinetic experiments were performed using  $\text{CDCl}_3$  stock solutions spiked with hexamethyldisiloxane (HMDSO) as an internal standard (0.005 M) against which the product integrations could be referenced. For each set of experiments, a fresh stock solution of azide and acetylide was prepared. To minimize the time a sample was mixed before spectra were collected, a NMR tube charged with a premeasured volume of Au(I)-acetylide stock solution was brought to the NMR instrument and the azide stock solution added to the tube directly prior to loading the sample into the magnet. A lock was already established on the NMR instrument with a similar sample, but to ensure accurate integrations, new lock and shims were established for each sample. Two steady state scans were executed to stabilize the magnetization prior to collection of each spectrum. If a third stock solution needed to be added to the tube (triphenylphosphine), it was mixed with the azide solution directly prior to mixing the azide with the acetylide.

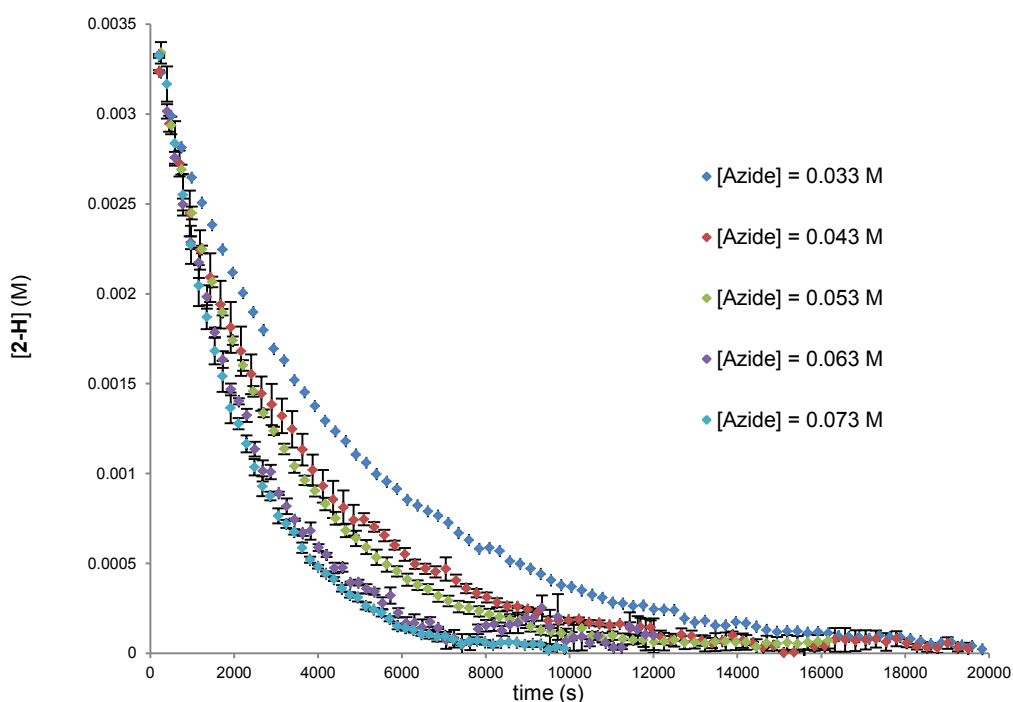

Figure S15. Concentration of **2-H** (0.0033 M) as a function of time under varying excess concentrations of **1**.

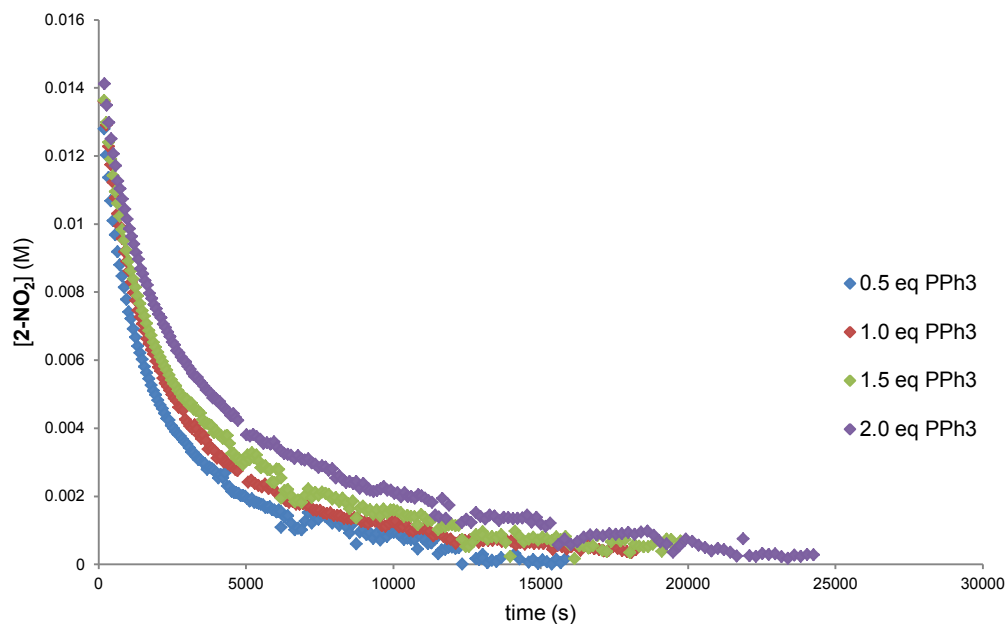

Figure S16. Concentration of **2-NO<sub>2</sub>** as a function of time when equal concentrations of **1** and **2-NO<sub>2</sub>** are reacted in the presence of free PPh<sub>3</sub>.

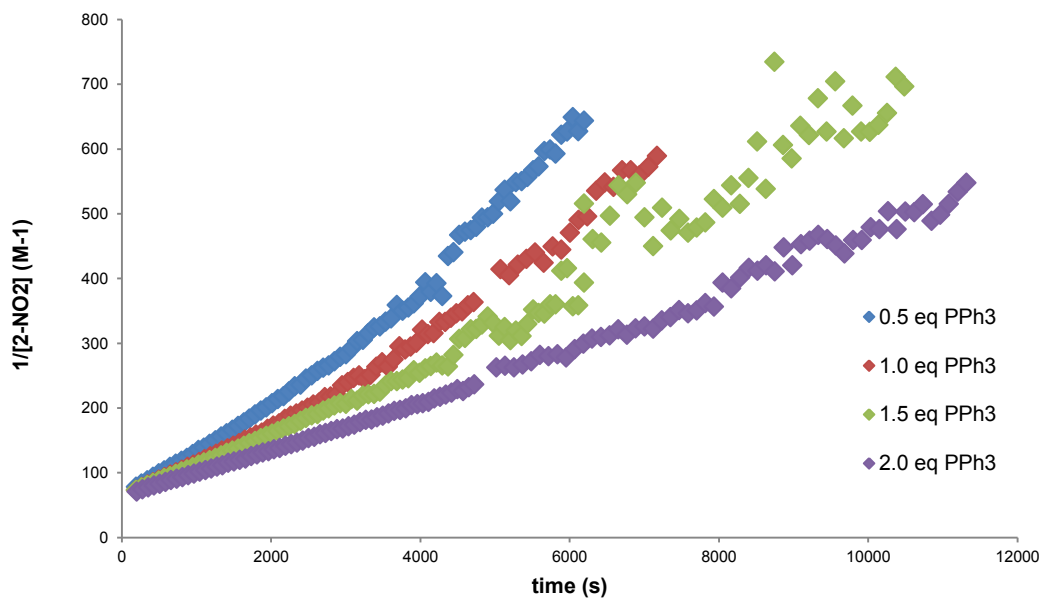

Figure S17.  $[2\text{-NO}_2]^{-1}$  as a function of time when equal concentrations of **1** and **2-NO<sub>2</sub>** are reacted in the presence of free PPh<sub>3</sub>.

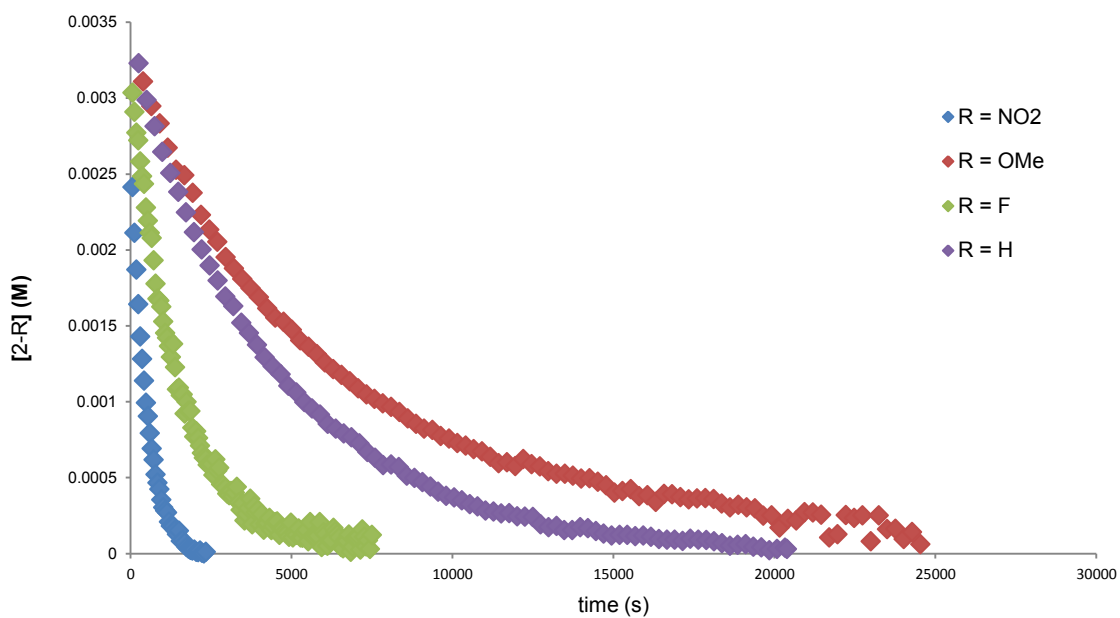

Figure S18. Plot of the  $[2-R]$  as a function of time under pseudo-first-order conditions of 10-fold excess  $[1]$ .

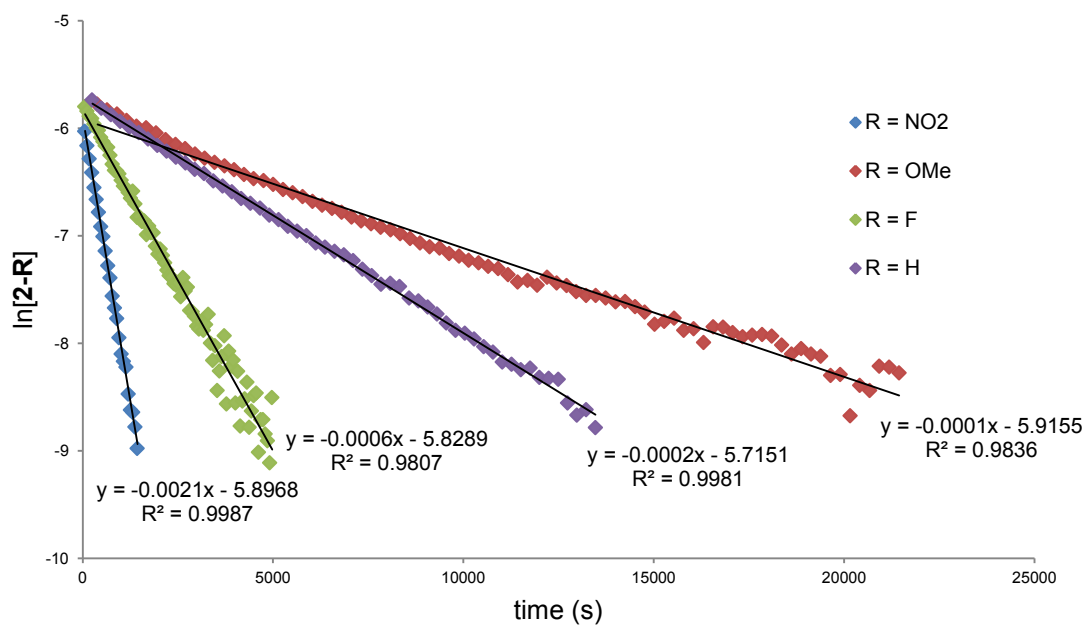

Figure S19. Plot of the  $\ln[2-R]$  as a function of time under pseudo-first-order conditions of 10-fold excess  $[1]$ .

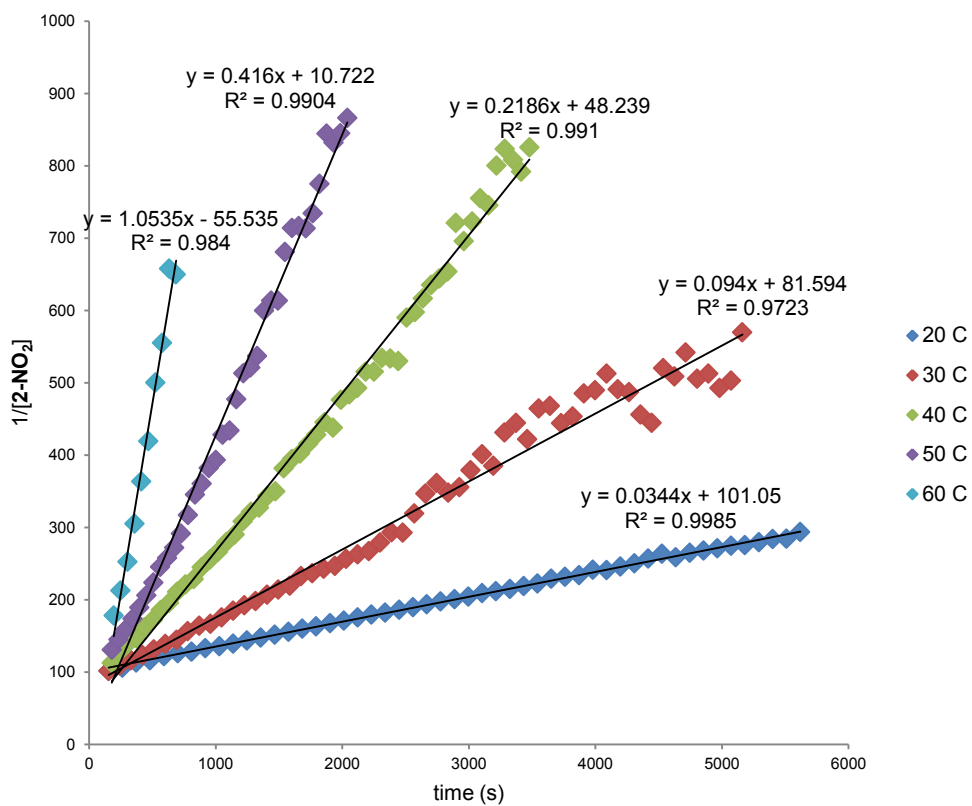

Figure S20.  $[2\text{-NO}_2]^{-1}$  as a function of time when equal concentrations of **1** and **2-NO<sub>2</sub>** are reacted at temperatures ranging from 20-60 °C.



The structure was solved and refined in SHELXTL6.1, using full-matrix least-squares refinement. The non-H atoms were refined with anisotropic thermal parameters and all of the H atoms were calculated in idealized positions and refined riding on their parent atoms. There are two chloroform solvent molecules in the asymmetric unit, one of chloroform is partially disordered over two of the chlorine atoms. In this case, atom C81 should also be disordered but it is to a lesser extent which did not allow for its resolution. In the final cycle of refinement, 10806 reflections (of which 9294 are observed with  $I > 2\sigma(I)$ ) were used to refine 570 parameters and the resulting  $R_1$ ,  $wR_2$  and S (goodness of fit) were 2.13%, 4.96% and 0.981, respectively. The refinement was carried out by minimizing the  $wR_2$  function using  $F^2$  rather than F values.  $R_1$  is calculated to provide a reference to the conventional R value but its function is not minimized.



Table S1. Crystal data and structure refinement for **3-NO<sub>2</sub>**.

|                                   |                                                                                                              |                         |
|-----------------------------------|--------------------------------------------------------------------------------------------------------------|-------------------------|
| Identification code               | apow6                                                                                                        |                         |
| Empirical formula                 | C <sub>46</sub> H <sub>36</sub> Au <sub>2</sub> Cl <sub>6</sub> N <sub>4</sub> O <sub>2</sub> P <sub>2</sub> |                         |
| Formula weight                    | 1345.36                                                                                                      |                         |
| Temperature                       | 100(2) K                                                                                                     |                         |
| Wavelength                        | 0.71073 Å                                                                                                    |                         |
| Crystal system                    | Triclinic                                                                                                    |                         |
| Space group                       | P $\bar{1}$                                                                                                  |                         |
| Unit cell dimensions              | a = 13.1709(4) Å                                                                                             | $\alpha$ = 104.570(2)°. |
|                                   | b = 13.9693(4) Å                                                                                             | $\beta$ = 113.005(1)°.  |
|                                   | c = 15.1962(4) Å                                                                                             | $\gamma$ = 101.240(2)°. |
| Volume                            | 2352.00(12) Å <sup>3</sup>                                                                                   |                         |
| Z                                 | 2                                                                                                            |                         |
| Density (calculated)              | 1.900 Mg/m <sup>3</sup>                                                                                      |                         |
| Absorption coefficient            | 6.682 mm <sup>-1</sup>                                                                                       |                         |
| F(000)                            | 1292                                                                                                         |                         |
| Crystal size                      | 0.35 x 0.06 x 0.05 mm <sup>3</sup>                                                                           |                         |
| Theta range for data collection   | 1.56 to 27.50°.                                                                                              |                         |
| Index ranges                      | -17 ≤ h ≤ 17, -18 ≤ k ≤ 18, -19 ≤ l ≤ 19                                                                     |                         |
| Reflections collected             | 79139                                                                                                        |                         |
| Independent reflections           | 10806 [R(int) = 0.0712]                                                                                      |                         |
| Completeness to theta = 27.50°    | 100.0 %                                                                                                      |                         |
| Absorption correction             | Integration                                                                                                  |                         |
| Max. and min. transmission        | 0.7142 and 0.2013                                                                                            |                         |
| Refinement method                 | Full-matrix least-squares on F <sup>2</sup>                                                                  |                         |
| Data / restraints / parameters    | 10806 / 0 / 570                                                                                              |                         |
| Goodness-of-fit on F <sup>2</sup> | 0.981                                                                                                        |                         |
| Final R indices [I > 2σ(I)]       | R1 = 0.0213, wR2 = 0.0496 [9294]                                                                             |                         |
| R indices (all data)              | R1 = 0.0274, wR2 = 0.0515                                                                                    |                         |
| Largest diff. peak and hole       | 1.577 and -1.305 e.Å <sup>-3</sup>                                                                           |                         |

$$R1 = \sum (||F_o| - |F_c||) / \sum |F_o| \quad wR2 = [\sum [w(F_o^2 - F_c^2)^2] / \sum [w(F_o^2)^2]]^{1/2}$$

$$S = [\sum [w(F_o^2 - F_c^2)^2] / (n-p)]^{1/2}$$

$$w = 1/[\sigma^2(F_o^2) + (m \cdot p)^2 + n \cdot p], \quad p = [\max(F_o^2, 0) + 2 \cdot F_c^2] / 3, \quad m \text{ \& \ } n \text{ are constants.}$$

Table S2. Atomic coordinates ( $\times 10^4$ ) and equivalent isotropic displacement parameters ( $\text{\AA}^2 \times 10^3$ ) for **3-NO<sub>2</sub>**. U(eq) is defined as one third of the trace of the orthogonalized U<sub>ij</sub> tensor.

| Atom | X        | Y       | Z        | U(eq) |
|------|----------|---------|----------|-------|
| Au1  | 8956(1)  | 2052(1) | 9540(1)  | 11(1) |
| Au2  | 9105(1)  | 3314(1) | 12082(1) | 11(1) |
| P1   | 7769(1)  | 2004(1) | 7944(1)  | 12(1) |
| P2   | 8318(1)  | 4541(1) | 12455(1) | 13(1) |
| O11  | 13672(2) | -799(2) | 9186(2)  | 33(1) |
| O14  | 12289(2) | -831(2) | 7799(2)  | 27(1) |
| N1   | 9997(2)  | 2354(2) | 11781(2) | 11(1) |
| N2   | 10837(2) | 2190(2) | 12552(2) | 15(1) |
| N3   | 11437(2) | 1727(2) | 12171(2) | 14(1) |
| N12  | 12804(2) | -574(2) | 8745(2)  | 22(1) |
| C1   | 10060(2) | 1987(2) | 10891(2) | 11(1) |
| C2   | 10981(2) | 1590(2) | 11150(2) | 12(1) |
| C11  | 11464(2) | 1067(2) | 10526(2) | 12(1) |
| C12  | 10874(3) | 715(2)  | 9447(2)  | 15(1) |
| C13  | 11312(3) | 186(2)  | 8857(2)  | 16(1) |
| C14  | 12354(3) | 20(2)   | 9349(2)  | 16(1) |
| C15  | 12977(3) | 375(2)  | 10412(2) | 19(1) |
| C16  | 12523(3) | 883(2)  | 10987(2) | 16(1) |
| C21  | 8218(2)  | 1344(2) | 7027(2)  | 13(1) |
| C22  | 8452(3)  | 1769(2) | 6368(2)  | 16(1) |
| C23  | 8836(3)  | 1238(3) | 5722(2)  | 20(1) |
| C24  | 8988(3)  | 291(3)  | 5736(2)  | 21(1) |
| C25  | 8758(3)  | -137(2) | 6401(2)  | 18(1) |
| C26  | 8379(3)  | 381(2)  | 7044(2)  | 17(1) |
| C31  | 6254(3)  | 1221(2) | 7431(2)  | 14(1) |
| C32  | 5879(3)  | 962(3)  | 8103(2)  | 22(1) |
| C33  | 4753(3)  | 312(3)  | 7743(3)  | 27(1) |
| C34  | 3976(3)  | -54(3)  | 6710(3)  | 26(1) |
| C35  | 4328(3)  | 219(3)  | 6039(3)  | 23(1) |
| C36  | 5471(3)  | 838(2)  | 6395(2)  | 18(1) |
| C41  | 7811(3)  | 3272(2) | 7826(2)  | 13(1) |
| C42  | 6869(3)  | 3438(2) | 7117(2)  | 18(1) |
| C43  | 6974(3)  | 4419(3) | 7040(2)  | 20(1) |
| C44  | 8012(3)  | 5247(2) | 7679(2)  | 18(1) |
| C45  | 8942(3)  | 5093(2) | 8397(2)  | 17(1) |
| C46  | 8851(3)  | 4107(2) | 8474(2)  | 16(1) |
| C51  | 8210(3)  | 5297(2) | 11627(2) | 14(1) |
| C52  | 8736(3)  | 6377(2) | 12011(2) | 18(1) |

|      |          |          |          |       |
|------|----------|----------|----------|-------|
| C53  | 8683(3)  | 6911(3)  | 11337(3) | 21(1) |
| C54  | 8094(3)  | 6374(3)  | 10295(2) | 22(1) |
| C55  | 7555(3)  | 5296(3)  | 9903(2)  | 24(1) |
| C56  | 7617(3)  | 4755(3)  | 10566(2) | 21(1) |
| C61  | 9261(3)  | 5494(2)  | 13750(2) | 15(1) |
| C62  | 8829(3)  | 6013(3)  | 14357(2) | 23(1) |
| C63  | 9590(4)  | 6777(3)  | 15319(2) | 28(1) |
| C64  | 10782(3) | 7014(3)  | 15677(2) | 27(1) |
| C65  | 11225(3) | 6492(3)  | 15092(2) | 26(1) |
| C66  | 10452(3) | 5720(2)  | 14120(2) | 20(1) |
| C71  | 6873(3)  | 4085(2)  | 12344(2) | 16(1) |
| C72  | 6168(3)  | 4722(3)  | 12270(3) | 24(1) |
| C73  | 5101(3)  | 4378(3)  | 12252(3) | 28(1) |
| C74  | 4717(3)  | 3403(3)  | 12297(3) | 27(1) |
| C75  | 5399(3)  | 2770(3)  | 12351(3) | 24(1) |
| C76  | 6479(3)  | 3103(2)  | 12372(2) | 17(1) |
| C81  | 6209(4)  | 7320(3)  | 1409(3)  | 38(1) |
| CI1  | 5163(1)  | 6888(1)  | 1796(1)  | 30(1) |
| CI2  | 7411(1)  | 8382(1)  | 2457(1)  | 41(1) |
| CI3  | 5606(1)  | 7687(1)  | 357(1)   | 51(1) |
| CI1' | 5384(18) | 5941(16) | 464(16)  | 96(4) |
| CI2' | 6780(20) | 7960(20) | 2157(19) | 96(4) |
| CI3' | 5030(20) | 7902(19) | 195(18)  | 96(4) |
| C82  | 6490(3)  | 7421(3)  | 5575(3)  | 30(1) |
| CI4  | 6055(1)  | 6119(1)  | 5473(1)  | 61(1) |
| CI5  | 6558(1)  | 7482(1)  | 4449(1)  | 32(1) |
| CI6  | 5537(1)  | 8066(1)  | 5792(1)  | 42(1) |

---

Table S3. Bond lengths [Å] for **3-NO<sub>2</sub>**.

| Bond    | Length    | Bond        | Length   |
|---------|-----------|-------------|----------|
| Au1-C1  | 2.036(3)  | C35-C36     | 1.389(4) |
| Au1-P1  | 2.2907(7) | C41-C42     | 1.396(4) |
| Au2-N1  | 2.028(2)  | C41-C46     | 1.397(4) |
| Au2-P2  | 2.2347(8) | C42-C43     | 1.388(4) |
| P1-C31  | 1.814(3)  | C43-C44     | 1.390(4) |
| P1-C41  | 1.816(3)  | C44-C45     | 1.384(4) |
| P1-C21  | 1.830(3)  | C45-C46     | 1.397(4) |
| P2-C71  | 1.811(3)  | C51-C52     | 1.389(4) |
| P2-C51  | 1.819(3)  | C51-C56     | 1.398(4) |
| P2-C61  | 1.821(3)  | C52-C53     | 1.400(4) |
| O11-N12 | 1.225(4)  | C53-C54     | 1.374(5) |
| O14-N12 | 1.240(3)  | C54-C55     | 1.388(5) |
| N1-C1   | 1.363(3)  | C55-C56     | 1.392(4) |
| N1-N2   | 1.367(3)  | C61-C66     | 1.380(4) |
| N2-N3   | 1.322(3)  | C61-C62     | 1.391(4) |
| N3-C2   | 1.371(3)  | C62-C63     | 1.390(5) |
| N12-C14 | 1.454(4)  | C63-C64     | 1.383(5) |
| C1-C2   | 1.391(4)  | C64-C65     | 1.381(5) |
| C2-C11  | 1.464(4)  | C65-C66     | 1.406(4) |
| C11-C16 | 1.403(4)  | C71-C76     | 1.387(4) |
| C11-C12 | 1.407(4)  | C71-C72     | 1.398(4) |
| C12-C13 | 1.386(4)  | C72-C73     | 1.381(5) |
| C13-C14 | 1.381(4)  | C73-C74     | 1.386(5) |
| C14-C15 | 1.390(4)  | C74-C75     | 1.373(5) |
| C15-C16 | 1.374(4)  | C75-C76     | 1.392(4) |
| C21-C22 | 1.385(4)  | C81-C12'    | 1.10(3)  |
| C21-C26 | 1.407(4)  | C81-C13     | 1.741(4) |
| C22-C23 | 1.392(4)  | C81-C11     | 1.759(4) |
| C23-C24 | 1.381(5)  | C81-C12     | 1.780(4) |
| C24-C25 | 1.394(4)  | C81-C11'    | 1.88(2)  |
| C25-C26 | 1.376(4)  | C81-C13'    | 2.34(2)  |
| C31-C36 | 1.386(4)  | C11'-C11'#1 | 2.43(4)  |
| C31-C32 | 1.388(4)  | C82-C14     | 1.744(4) |
| C32-C33 | 1.384(4)  | C82-C16     | 1.764(4) |
| C33-C34 | 1.382(5)  | C82-C15     | 1.770(4) |
| C34-C35 | 1.376(5)  |             |          |

Symmetry transformations used to generate equivalent atoms:

Table S4. Bond Angles [°] for **3-NO<sub>2</sub>**.

| Bond         | Length     | Bond        | Length   |
|--------------|------------|-------------|----------|
| C1-Au1-P1    | 174.44(8)  | C24-C23-C22 | 120.3(3) |
| N1-Au2-P2    | 172.64(7)  | C23-C24-C25 | 120.0(3) |
| C31-P1-C41   | 108.24(14) | C26-C25-C24 | 120.2(3) |
| C31-P1-C21   | 103.75(13) | C25-C26-C21 | 119.9(3) |
| C41-P1-C21   | 105.59(13) | C36-C31-C32 | 118.8(3) |
| C31-P1-Au1   | 113.75(10) | C36-C31-P1  | 122.8(2) |
| C41-P1-Au1   | 115.5(1)   | C32-C31-P1  | 118.4(2) |
| C21-P1-Au1   | 109.05(10) | C33-C32-C31 | 120.7(3) |
| C71-P2-C51   | 106.13(14) | C34-C33-C32 | 119.9(3) |
| C71-P2-C61   | 107.26(14) | C35-C34-C33 | 120.0(3) |
| C51-P2-C61   | 104.82(14) | C34-C35-C36 | 120.1(3) |
| C71-P2-Au2   | 116.56(11) | C31-C36-C35 | 120.4(3) |
| C51-P2-Au2   | 110.47(10) | C42-C41-C46 | 119.4(3) |
| C61-P2-Au2   | 110.85(10) | C42-C41-P1  | 123.2(2) |
| C1-N1-N2     | 110.1(2)   | C46-C41-P1  | 117.4(2) |
| C1-N1-Au2    | 127.02(19) | C43-C42-C41 | 120.3(3) |
| N2-N1-Au2    | 121.35(17) | C42-C43-C44 | 120.4(3) |
| N3-N2-N1     | 108.3(2)   | C45-C44-C43 | 119.7(3) |
| N2-N3-C2     | 108.1(2)   | C44-C45-C46 | 120.5(3) |
| O11-N12-O14  | 122.7(3)   | C45-C46-C41 | 119.8(3) |
| O11-N12-C14  | 119.1(3)   | C52-C51-C56 | 119.5(3) |
| O14-N12-C14  | 118.2(3)   | C52-C51-P2  | 122.4(2) |
| N1-C1-C2     | 104.5(2)   | C56-C51-P2  | 118.0(2) |
| N1-C1-Au1    | 123.4(2)   | C51-C52-C53 | 120.0(3) |
| C2-C1-Au1    | 132.2(2)   | C54-C53-C52 | 120.2(3) |
| N3-C2-C1     | 109.1(2)   | C53-C54-C55 | 120.2(3) |
| N3-C2-C11    | 119.9(3)   | C54-C55-C56 | 120.0(3) |
| C1-C2-C11    | 131.0(3)   | C55-C56-C51 | 120.0(3) |
| C16-C11-C12  | 117.9(3)   | C66-C61-C62 | 119.6(3) |
| C16-C11-C2   | 120.7(3)   | C66-C61-P2  | 117.7(2) |
| C12-C11-C2   | 121.3(3)   | C62-C61-P2  | 122.7(2) |
| C13-C12-C11  | 121.2(3)   | C63-C62-C61 | 120.4(3) |
| C14-C13-C12  | 118.6(3)   | C64-C63-C62 | 119.7(3) |
| C14-C13-H13A | 120.7      | C65-C64-C63 | 120.6(3) |
| C13-C14-C15  | 122.0(3)   | C64-C65-C66 | 119.4(3) |
| C13-C14-N12  | 119.6(3)   | C61-C66-C65 | 120.3(3) |
| C15-C14-N12  | 118.4(3)   | C76-C71-C72 | 119.6(3) |
| C16-C15-C14  | 118.7(3)   | C76-C71-P2  | 119.2(2) |
| C15-C16-C11  | 121.5(3)   | C72-C71-P2  | 121.1(2) |
| C22-C21-C26  | 119.6(3)   | C73-C72-C71 | 119.8(3) |
| C22-C21-P1   | 123.3(2)   | C72-C73-C74 | 120.5(3) |
| C26-C21-P1   | 117.0(2)   | C75-C74-C73 | 119.7(3) |
| C21-C22-C23  | 119.9(3)   | C74-C75-C76 | 120.7(3) |

|               |           |                 |            |
|---------------|-----------|-----------------|------------|
| C71-C76-C75   | 119.7(3)  |                 |            |
| CI2'-C81-CI3  | 116.6(12) |                 |            |
| CI2'-C81-CI1  | 93.0(13)  | CI2'-C81-CI3'   | 112.2(14)  |
| CI3-C81-CI1   | 111.2(2)  | CI3-C81-CI3'    | 16.8(6)    |
| CI2'-C81-CI2  | 16.5(12)  | CI1-C81-CI3'    | 96.1(6)    |
| CI3-C81-CI2   | 110.7(2)  | CI2-C81-CI3'    | 111.4(6)   |
| CI1-C81-CI2   | 109.4(2)  | CI1'-C81-CI3'   | 88.6(9)    |
| CI2'-C81-CI1' | 158.1(14) | C81-CI1'-CI1'#1 | 167.3(16)  |
| CI3-C81-CI1'  | 85.3(6)   | CI4-C82-CI6     | 111.5(2)   |
| CI1-C81-CI1'  | 77.6(6)   | CI4-C82-CI5     | 110.0(2)   |
| CI2-C81-CI1'  | 157.3(7)  | CI6-C82-CI5     | 109.98(18) |

Table S-5. Anisotropic displacement parameters ( $\text{\AA}^2 \times 10^3$ ) for **3-NO<sub>2</sub>**. The anisotropic displacement factor exponent takes the form:  $-2\pi^2[h^2 a^{*2}U^{11} + \dots + 2 h k a^* b^* U^{12}]$

|     | U11   | U22   | U33   | U23   | U13   | U12   |
|-----|-------|-------|-------|-------|-------|-------|
| Au1 | 11(1) | 12(1) | 8(1)  | 5(1)  | 3(1)  | 5(1)  |
| Au2 | 13(1) | 12(1) | 9(1)  | 4(1)  | 5(1)  | 5(1)  |
| P1  | 12(1) | 13(1) | 9(1)  | 6(1)  | 2(1)  | 4(1)  |
| P2  | 14(1) | 14(1) | 11(1) | 5(1)  | 6(1)  | 5(1)  |
| O11 | 32(1) | 37(2) | 38(2) | 12(1) | 20(1) | 23(1) |
| O14 | 30(1) | 24(1) | 24(1) | -1(1) | 17(1) | 4(1)  |
| N1  | 15(1) | 9(1)  | 7(1)  | 2(1)  | 4(1)  | 3(1)  |
| N2  | 18(1) | 17(1) | 10(1) | 7(1)  | 5(1)  | 9(1)  |
| N3  | 15(1) | 17(1) | 9(1)  | 6(1)  | 3(1)  | 6(1)  |
| N12 | 21(2) | 14(1) | 29(2) | 4(1)  | 15(1) | 3(1)  |
| C1  | 14(1) | 8(1)  | 9(1)  | 4(1)  | 4(1)  | 3(1)  |
| C2  | 12(1) | 10(1) | 10(1) | 4(1)  | 3(1)  | 2(1)  |
| C11 | 12(1) | 10(1) | 13(1) | 5(1)  | 5(1)  | 3(1)  |
| C12 | 16(2) | 15(2) | 14(2) | 7(1)  | 6(1)  | 6(1)  |
| C13 | 20(2) | 14(2) | 12(1) | 3(1)  | 7(1)  | 2(1)  |
| C14 | 19(2) | 11(1) | 20(2) | 4(1)  | 12(1) | 3(1)  |
| C15 | 17(2) | 20(2) | 20(2) | 9(1)  | 7(1)  | 8(1)  |
| C16 | 15(2) | 18(2) | 12(1) | 5(1)  | 3(1)  | 6(1)  |
| C21 | 10(1) | 13(1) | 10(1) | 2(1)  | 1(1)  | 2(1)  |
| C22 | 15(2) | 17(2) | 13(1) | 7(1)  | 3(1)  | 4(1)  |
| C23 | 22(2) | 25(2) | 17(2) | 10(1) | 11(1) | 4(1)  |
| C24 | 20(2) | 24(2) | 18(2) | 4(1)  | 11(1) | 7(1)  |
| C25 | 16(2) | 16(2) | 16(2) | 3(1)  | 4(1)  | 4(1)  |
| C26 | 18(2) | 15(2) | 12(1) | 5(1)  | 4(1)  | 2(1)  |
| C31 | 13(1) | 14(2) | 17(2) | 8(1)  | 5(1)  | 6(1)  |
| C32 | 19(2) | 29(2) | 18(2) | 14(1) | 7(1)  | 9(1)  |
| C33 | 20(2) | 38(2) | 32(2) | 22(2) | 15(2) | 10(2) |
| C34 | 14(2) | 28(2) | 31(2) | 12(2) | 7(2)  | 6(1)  |
| C35 | 17(2) | 24(2) | 21(2) | 4(1)  | 4(1)  | 5(1)  |
| C36 | 18(2) | 19(2) | 16(2) | 5(1)  | 7(1)  | 6(1)  |
| C41 | 16(2) | 12(1) | 12(1) | 4(1)  | 8(1)  | 5(1)  |
| C42 | 15(2) | 17(2) | 14(2) | 6(1)  | 1(1)  | 5(1)  |
| C43 | 20(2) | 25(2) | 20(2) | 15(1) | 6(1)  | 12(1) |
| C44 | 26(2) | 17(2) | 21(2) | 11(1) | 14(1) | 11(1) |
| C45 | 19(2) | 15(2) | 16(2) | 5(1)  | 8(1)  | 3(1)  |
| C46 | 15(2) | 19(2) | 14(1) | 8(1)  | 6(1)  | 6(1)  |
| C51 | 13(1) | 18(2) | 15(2) | 9(1)  | 7(1)  | 6(1)  |
| C52 | 16(2) | 20(2) | 16(2) | 7(1)  | 6(1)  | 5(1)  |
| C53 | 20(2) | 18(2) | 28(2) | 12(1) | 10(1) | 7(1)  |
| C54 | 22(2) | 30(2) | 22(2) | 18(2) | 11(1) | 12(2) |

|     |       |       |       |       |       |       |
|-----|-------|-------|-------|-------|-------|-------|
| C55 | 29(2) | 30(2) | 13(2) | 9(1)  | 10(1) | 8(2)  |
| C56 | 29(2) | 18(2) | 14(2) | 5(1)  | 9(1)  | 5(1)  |
| C61 | 24(2) | 13(1) | 10(1) | 6(1)  | 7(1)  | 7(1)  |
| C62 | 30(2) | 22(2) | 17(2) | 8(1)  | 12(2) | 10(2) |
| C63 | 53(2) | 18(2) | 15(2) | 6(1)  | 18(2) | 15(2) |
| C64 | 47(2) | 16(2) | 8(2)  | 5(1)  | 4(2)  | 4(2)  |
| C65 | 26(2) | 23(2) | 18(2) | 9(1)  | 1(1)  | 5(2)  |
| C66 | 27(2) | 17(2) | 16(2) | 6(1)  | 8(1)  | 8(1)  |
| C71 | 16(2) | 20(2) | 11(1) | 4(1)  | 7(1)  | 5(1)  |
| C72 | 26(2) | 22(2) | 31(2) | 14(2) | 16(2) | 12(2) |
| C73 | 25(2) | 32(2) | 38(2) | 16(2) | 19(2) | 15(2) |
| C74 | 20(2) | 29(2) | 34(2) | 12(2) | 15(2) | 6(2)  |
| C75 | 20(2) | 24(2) | 28(2) | 12(2) | 10(2) | 5(1)  |
| C76 | 18(2) | 19(2) | 16(2) | 7(1)  | 8(1)  | 8(1)  |
| C81 | 39(2) | 32(2) | 40(2) | 8(2)  | 22(2) | 8(2)  |
| CI1 | 32(1) | 35(1) | 37(1) | 24(1) | 20(1) | 16(1) |
| CI2 | 31(1) | 33(1) | 46(1) | -1(1) | 17(1) | 7(1)  |
| CI3 | 74(1) | 48(1) | 31(1) | 20(1) | 26(1) | 6(1)  |
| C82 | 29(2) | 26(2) | 21(2) | 14(2) | -1(2) | 2(2)  |
| CI4 | 66(1) | 31(1) | 48(1) | 24(1) | -6(1) | -6(1) |
| CI5 | 35(1) | 36(1) | 20(1) | 11(1) | 7(1)  | 14(1) |
| CI6 | 37(1) | 66(1) | 28(1) | 22(1) | 13(1) | 20(1) |

---
